# Supplementary material for: Binding of inorganic cations by p-sulfonatocalix[4]arene monitored through competitive fluorophore displacement in aqueous solution
Source: Royal Society of Chemistry journal article supplement (doi:10.1039/b510319c), 2005-01-01
Supplement: b510319c.pdf [file b510319c.pdf]

## Binding of inorganic cations by *p*-sulfonatocalix[4]arene monitored through competitive fluorophore displacement in aqueous solution

Hüseyin Bakirci, Apurba L. Koner and Werner M. Nau\*

*School of Engineering and Sciences, International University Bremen,  
Campus Ring 1, 28579 Bremen, Germany*

### Experimental Details

DBO was synthesized according to a literature procedure.<sup>1</sup> CX4 (>97%) and metal salts (>99%) were purchased from Fluka and used as received; chloride salts were arbitrarily selected, since anions were shown not to affect the complexation process.<sup>2,3</sup> All experiments were performed at ambient temperature in D<sub>2</sub>O (99.8%, Omnilab). The pD values of the solutions were adjusted by addition of NaOD. pH readings were taken with a WTW 330i pH meter with a combined pH glass electrode (SenTix Mic) and converted to pD (+ 0.40 units).<sup>4</sup> The corrected steady-state fluorescence spectra ( $\lambda_{\text{exc}} = 365 \text{ nm}$ ) were measured with a Varian Cary Eclipse fluorimeter.

The fitting according to the competitive complexation scheme has been described previously.<sup>5</sup> The moderate binding constants of DBO ( $4700 \text{ M}^{-1}$  at pD 2.4 and  $1200 \text{ M}^{-1}$  at pD 7.4)<sup>5</sup> are ideally suited to quantify also weak binding phenomena. Note that in a competitive binding scheme, to reach 50% displacement of the probe, the product of binding constant and concentration of the competitor must match the value of the same product for the probe; a too large binding constant of the probe, at constant probe concentration, would therefore need to be balanced by exceedingly large metal ion concentrations, *if* the binding of the cation is weak.

### References

- 1 R. Askani, *Chem. Ber.*, 1965, **98**, 2551.
- 2 C. Bonal, Y. Israëli, J.-P. Morel, and N. Morel-Desrosiers, *J. Chem. Soc., Perkin Trans. 2*, 2001, 1075.
- 3 Y. Israëli, C. Bonal, C. Detellier, J.-P. Morel, and N. Morel-Desrosiers, *Can. J. Chem.*, 2002, **80**, 163.
- 4 P. K. Glasoe and F. A. Long, *J. Phys. Chem.*, 1960, **64**, 188.
- 5 H. Bakirci and W. M. Nau, *Adv. Funct. Mat.*, 2005, DOI: 10.1002/adfm.200500219.
